# Supplementary material for: Ureteral Stricture Rates after Ho:YAG vs TFL Ureteroscopic Laser Lithotripsy: A Database Analysis
Source: Research Square preprint supplement (doi:10.21203/rs.3.rs-7787439/v1), 2025-10-31
Supplement: Supplementary file 1 [file 88010b0651c0de681c5c9cd3.docx]

**Ureteroscopic Laser Lithotripsy – Index Procedure**

| CODE | DESCRIPTION |
| --- | --- |
| 52325 | Cystourethroscopy (including ureteral catheterization); with fragmentation of ureteral calculus (eg, ultrasonic or electro-hydraulic technique) |
| 52353 | Cystourethroscopy, with ureteroscopy and/or pyeloscopy; with lithotripsy (ureteral catheterization is included) |
| 52356 | Cystourethroscopy, with ureteroscopy and/or pyeloscopy; with lithotripsy including insertion of indwelling ureteral stent (e.g., Gibbons or double-J type) |
| 0TF68ZZ | Fragmentation in Right Ureter, Via Natural or Artificial Opening Endoscopic |
| 0TF78ZZ | Fragmentation in Left Ureter, Via Natural or Artificial Opening Endoscopic |

**Existing ureteral stricture or ureteropelvic junction obstruction**

| CODE | DESCRIPTION |
| --- | --- |
| 591 | Hydronephrosis |
| 593.3 | Stricture or kinking of ureter |
| 593.4 | Other ureteric obstruction |
| 753.21 | Congenital obstruction of ureteropelvic junction |
| 753.22 | Congenital obstruction of ureterovesical junction |
| 753.29 | Other obstructive defect of renal pelvis and ureter |
| N13.0 | N13.0 Hydronephrosis with ureteropelvic junction obstruction |
| N13.1 | Hydronephrosis with ureteral stricture, not elsewhere classified |
| N13.30 | Unspecified hydronephrosis |
| N13.39 | Other hydronephrosis |
| N13.5 | Crossing vessel and stricture of ureter without hydronephrosis |
| N13.8 | Other obstructive and reflux uropathy |
| Q62.0 | Congenital hydronephrosis |
| Q62.10 | Congenital occlusion of ureter, unspecified |
| Q62.11 | Congenital occlusion of ureteropelvic junction |
| Q62.12 | Congenital occlusion of ureterovesical orifice |
| Q62.39 | Other obstructive defects of renal pelvis and ureter |

**Concurrent PCNL**

| CODE | DESCRIPTION |
| --- | --- |
| 50080 | Percutaneous nephrolithotomy or pyelolithotomy, lithotripsy, stone extraction, antegrade ureteroscopy, antegrade stent placement and nephrostomy tube placement, when performed, including imaging guidance; simple (eg, stone[s] up to 2 cm in single location of kidney or renal pelvis, nonbranching stones) |
| 50081 | Percutaneous nephrolithotomy or pyelolithotomy, lithotripsy, stone extraction, antegrade ureteroscopy, antegrade stent placement and nephrostomy tube placement, when performed, including imaging guidance; complex (eg, stone[s] > 2 cm, branching stones, stones in multiple locations, ureter stones, complicated anatomy) |
| 0TC03ZZ | Extirpation of Matter from Right Kidney, Percutaneous Approach |
| 0TC04ZZ | Extirpation of Matter from Right Kidney, Percutaneous Endoscopic Approach |
| 0TC13ZZ | Extirpation of Matter from Left Kidney, Percutaneous Approach |
| 0TC14ZZ | Extirpation of Matter from Left Kidney, Percutaneous Endoscopic Approach |
| 0TC33ZZ | Extirpation of Matter from Right Kidney Pelvis, Percutaneous Approach |
| 0TC34ZZ | Extirpation of Matter from Right Kidney Pelvis, Percutaneous Endoscopic Approach |
| 0TC43ZZ | Extirpation of Matter from Left Kidney Pelvis, Percutaneous Approach |
| 0TC44ZZ | Extirpation of Matter from Left Kidney Pelvis, Percutaneous Endoscopic Approach |
| 0TF33ZZ | Fragmentation in Right Kidney Pelvis, Percutaneous Approach |
| 0TF34ZZ | Fragmentation in Right Kidney Pelvis, Percutaneous Endoscopic Approach |
| 0TF43ZZ | Fragmentation in Left Kidney Pelvis, Percutaneous Approach |
| 0TF44ZZ | Fragmentation in Left Kidney Pelvis, Percutaneous Endoscopic Approach |

**Diabetes**

| CODE | DESCRIPTION |
| --- | --- |
| E08.* | Diabetes mellitus due to underlying condition |
| E09.* | Drug or chemical induced diabetes mellitus |
| E10.* | Type 1 diabetes mellitus |
| E11.* | Type 2 diabetes mellitus |
| E13.* | Other specified diabetes mellitus |
| E23.2 | Diabetes insipidus |
| N25.1 | Nephrogenic diabetes insipidus |
| O24.* | Diabetes mellitus in pregnancy, childbirth, and the puerperium |
| 249.* | Secondary diabetes mellitus |
| 250.* | Diabetes mellitus |
| 648.0* | Diabetes mellitus [complicating pregnancy, childbirth, or the puerperium] |
| 648.8* | Abnormal glucose tolerance [complicating pregnancy, childbirth, or the puerperium] |
| V12.21 | Personal history of gestational diabetes |

**Chronic Kidney Disease**

| CODE | DESCRIPTION |
| --- | --- |
| E08.22 | Diabetes mellitus due to underlying condition with diabetic chronic kidney disease |
| E09.22 | Drug or chemical induced diabetes mellitus with diabetic chronic kidney disease |
| E10.22 | Type 1 diabetes mellitus with diabetic chronic kidney disease |
| E11.22 | Type 2 diabetes mellitus with diabetic chronic kidney disease |
| E13.22 | Other specified diabetes mellitus with diabetic chronic kidney disease |
| I12.0 | Hypertensive chronic kidney disease with stage 5 chronic kidney disease or end stage renal disease |
| I12.9 | Hypertensive chronic kidney disease with stage 1 through stage 4 chronic kidney disease, or unspecified chronic kidney disease |
| I13.0 | Hypertensive heart and chronic kidney disease with heart failure and stage 1 through stage 4 chronic kidney disease, or unspecified chronic kidney disease |
| I13.10 | Hypertensive heart and chronic kidney disease without heart failure, with stage 1 through stage 4 chronic kidney disease, or unspecified chronic kidney disease |
| I13.11 | Hypertensive heart and chronic kidney disease without heart failure, with stage 5 chronic kidney disease, or end stage renal disease |
| I13.2 | Hypertensive heart and chronic kidney disease with heart failure and with stage 5 chronic kidney disease, or end stage renal disease |
| M10.3* | Gout due to [renal impairment] |
| N01.* | Rapidly progressive [nephritic syndrome] |
| N02.0 | Recurrent and persistent hematuria with minor glomerular abnormality |
| N02.1 | Recurrent and persistent hematuria with focal and segmental glomerular lesions |
| N02.2 | Recurrent and persistent hematuria with diffuse membranous glomerulonephritis |
| N02.3 | Recurrent and persistent hematuria with diffuse mesangial proliferative glomerulonephritis |
| N02.4 | Recurrent and persistent hematuria with diffuse endocapillary proliferative glomerulonephritis |
| N02.5 | Recurrent and persistent hematuria with diffuse mesangiocapillary glomerulonephritis |
| N02.6 | Recurrent and persistent hematuria with dense deposit disease |
| N02.7 | Recurrent and persistent hematuria with diffuse crescentic glomerulonephritis |
| N02.8 | Recurrent and persistent hematuria with other morphologic changes |
| N02.9 | Recurrent and persistent hematuria with unspecified morphologic changes |
| N02.A | Recurrent and persistent hematuria with C3 glomerulonephritis |
| N02.B1 | Recurrent and persistent immunoglobulin A nephropathy with glomerular lesion |
| N02.B2 | Recurrent and persistent immunoglobulin A nephropathy with focal and segmental glomerular lesion |
| N02.B3 | Recurrent and persistent immunoglobulin A nephropathy with diffuse membranoproliferative glomerulonephritis |
| N02.B4 | Recurrent and persistent immunoglobulin A nephropathy with diffuse membranous glomerulonephritis |
| N02.B5 | Recurrent and persistent immunoglobulin A nephropathy with diffuse mesangial proliferative glomerulonephritis |
| N02.B6 | Recurrent and persistent immunoglobulin A nephropathy with diffuse mesangiocapillary glomerulonephritis |
| N02.B9 | Other recurrent and persistent immunoglobulin A nephropathy |
| N03.* | Chronic [nephritic syndrome] |
| N04.* | [Nephrotic syndrome] |
| N05.* | Unspecified [nephritic syndrome] |
| N06.* | [Isolated proteinuria] |
| N07.* | [Hereditary nephropathy] |
| N08 | Glomerular disorders in diseases classified elsewhere |
| N11.0 | Nonobstructive reflux-associated chronic pyelonephritis |
| N11.1 | Chronic obstructive pyelonephritis |
| N11.8 | Other chronic tubulo-interstitial nephritis |
| N11.9 | Chronic tubulo-interstitial nephritis, unspecified |
| N14.0 | Analgesic nephropathy |
| N14.11 | Contrast-induced nephropathy |
| N14.19 | Nephropathy induced by other drugs, medicaments and biological substances |
| N14.2 | Nephropathy induced by unspecified drug, medicament or biological substance |
| N14.3 | Nephropathy induced by heavy metals |
| N14.4 | Toxic nephropathy, not elsewhere classified |
| N15.0 | Balkan nephropathy |
| N15.8 | Other specified renal tubulo-interstitial diseases |
| N15.9 | Renal tubulo-interstitial disease, unspecified |
| N16 | Renal tubulo-interstitial disorders in diseases classified elsewhere |
| N18.* | [Chronic kidney disease] |
| N25.0 | Renal osteodystrophy |
| N25.1 | Nephrogenic diabetes insipidus |
| N25.89 | Other disorders resulting from impaired renal tubular function |
| N25.9 | Disorder resulting from impaired renal tubular function, unspecified |
| N26.1 | Atrophy of kidney (terminal) |
| N26.9 | Renal sclerosis, unspecified |
| N99.0 | Postprocedural (acute) (chronic) kidney failure |
| Q61.02 | Congenital multiple renal cysts |
| Q61.11 | Cystic dilatation of collecting ducts |
| Q61.19 | Other polycystic kidney, infantile type |
| Q61.2 | Polycystic kidney, adult type |
| Q61.3 | Polycystic kidney, unspecified |
| Q61.4 | Renal dysplasia |
| Q61.5 | Medullary cystic kidney |
| Q61.8 | Other cystic kidney diseases |
| Q61.9 | Cystic kidney disease, unspecified |
| 403.00 | Hypertensive chronic kidney disease, malignant, with chronic kidney disease stage I through stage IV, or unspecified |
| 403.01 | Hypertensive chronic kidney disease, malignant, with chronic kidney disease stage V or end stage renal disease |
| 403.10 | Hypertensive chronic kidney disease, benign, with chronic kidney disease stage I through stage IV, or unspecified |
| 403.11 | Hypertensive chronic kidney disease, benign, with chronic kidney disease stage V or end stage renal disease |
| 403.90 | Hypertensive chronic kidney disease, unspecified, with chronic kidney disease stage I through stage IV, or unspecified |
| 403.91 | Hypertensive chronic kidney disease, unspecified, with chronic kidney disease stage V or end stage renal disease |
| 404.00 | Hypertensive heart and chronic kidney disease, malignant, without heart failure and with chronic kidney disease stage I through stage IV, or unspecified |
| 404.01 | Hypertensive heart and chronic kidney disease, malignant, with heart failure and with chronic kidney disease stage I through stage IV, or unspecified |
| 404.02 | Hypertensive heart and chronic kidney disease, malignant, without heart failure and with chronic kidney disease stage V or end stage renal disease |
| 404.03 | Hypertensive heart and chronic kidney disease, malignant, with heart failure and with chronic kidney disease stage V or end stage renal disease |
| 404.10 | Hypertensive heart and chronic kidney disease, benign, without heart failure and with chronic kidney disease stage I through stage IV, or unspecified |
| 404.11 | Hypertensive heart and chronic kidney disease, benign, with heart failure and with chronic kidney disease stage I through stage IV, or unspecified |
| 404.12 | Hypertensive heart and chronic kidney disease, benign, without heart failure and with chronic kidney disease stage V or end stage renal disease |
| 404.13 | Hypertensive heart and chronic kidney disease, benign, with heart failure and chronic kidney disease stage V or end stage renal disease |
| 404.90 | Hypertensive heart and chronic kidney disease, unspecified, without heart failure and with chronic kidney disease stage I through stage IV, or unspecified |
| 404.91 | Hypertensive heart and chronic kidney disease, unspecified, with heart failure and with chronic kidney disease stage I through stage IV, or unspecified |
| 404.92 | Hypertensive heart and chronic kidney disease, unspecified, without heart failure and with chronic kidney disease stage V or end stage renal disease |
| 404.93 | Hypertensive heart and chronic kidney disease, unspecified, with heart failure and chronic kidney disease stage V or end stage renal disease |
| 582.0 | Chronic glomerulonephritis; With lesion of proliferative glomerulonephritis |
| 582.1 | Chronic glomerulonephritis; With lesion of membranous glomerulonephritis |
| 582.2 | Chronic glomerulonephritis; With lesion of membranoproliferative glomerulonephritis |
| 582.4 | Chronic glomerulonephritis; With lesion of rapidly progressive glomerulonephritis |
| 582.81 | Chronic glomerulonephritis in diseases classified elsewhere |
| 582.89 | Other chronic glomerulonephritis |
| 582.9 | Chronic glomerulonephritis with unspecified pathological lesion in kidney |
| 585.* | [Chronic kidney disease] |
| 753.10 | Cystic kidney disease, unspecified |
| 753.12 | Polycystic kidney, unspecified type |
| 753.13 | Polycystic kidney, autosomal dominant |
| 753.14 | Polycystic kidney, autosomal recessive |
| 753.15 | Renal dysplasia |
| 753.16 | Medullary cystic kidney |
| 753.17 | Medullary sponge kidney |
| 753.19 | Other specified cystic kidney disease |

**Tobacco/Nicotine Use**

| CODE | DESCRIPTION |
| --- | --- |
| F17.2* | Nicotine [dependence] |
| T65.2* | Toxic effect of [tobacco] |
| Z71.6 | Tobacco abuse counseling |
| Z72.0 | Tobacco use |
| Z87.891 | Personal history of nicotine dependence |
| 305.1 | Nondependent tobacco use disorder |
| 989.84 | Toxic effect of tobacco |
| V15.82 | History of tobacco use |
| E869.4 | Second hand tobacco smoke |

**History of Radiation**

| CODE | DESCRIPTION |
| --- | --- |
| V15.3 | Personal history of irradiation, presenting hazards to health |
| Z92.3 | Personal history of irradiation |
| 161633009 | History of radiation exposure (situation) |
| 315798002 | Personal history of irradiation (situation) |
| 372049008 | Assessment of history of previous radiation exposure (procedure) |
| 429479009 | History of radiation therapy (situation) |
| 53261000119103 | History of external beam radiation therapy (situation) |

**Neoplasms**

| CODE | DESCRIPTION |
| --- | --- |
| C64.1 | Malignant neoplasm of right kidney, except renal pelvis |
| C64.2 | Malignant neoplasm of left kidney, except renal pelvis |
| C64.9 | Malignant neoplasm of unspecified kidney, except renal pelvis |
| C65.1 | Malignant neoplasm of right renal pelvis |
| C65.2 | Malignant neoplasm of left renal pelvis |
| C65.9 | Malignant neoplasm of unspecified renal pelvis |
| C66.1 | Malignant neoplasm of right ureter |
| C66.2 | Malignant neoplasm of left ureter |
| C66.9 | Malignant neoplasm of unspecified ureter |
| C67.6 | Malignant neoplasm of ureteric orifice |
| C79.00 | Secondary malignant neoplasm of unspecified kidney and renal pelvis |
| C79.01 | Secondary malignant neoplasm of right kidney and renal pelvis |
| C79.02 | Secondary malignant neoplasm of left kidney and renal pelvis |
| C79.19 | Secondary malignant neoplasm of other urinary organs |
| C7A.093 | Malignant carcinoid tumor of the kidney |
| D41.10 | Neoplasm of uncertain behavior of unspecified renal pelvis |
| D41.11 | Neoplasm of uncertain behavior of right renal pelvis |
| D41.12 | Neoplasm of uncertain behavior of left renal pelvis |
| D41.20 | Neoplasm of uncertain behavior of unspecified ureter |
| D41.21 | Neoplasm of uncertain behavior of right ureter |
| D41.22 | Neoplasm of uncertain behavior of left ureter |
| 189.0 | Malignant neoplasm of kidney, except pelvis |
| 189.1 | Malignant neoplasm of renal pelvis |
| 189.2 | Malignant neoplasm of ureter |
| 198.0 | Secondary malignant neoplasm of kidney |
| 198.1 | Secondary malignant neoplasm of other urinary organs |
| 209.24 | Malignant carcinoid tumor of the kidney |
| 93985007 | Primary malignant neoplasm of renal pelvis (disorder) |
| 94121005 | Primary malignant neoplasm of ureter (disorder) |
| 94122003 | Primary malignant neoplasm of ureteric orifice of urinary bladder (disorder) |
| 94514000 | Metastatic malignant neoplasm to renal pelvis (disorder) |
| 94659001 | Metastatic malignant neoplasm to ureter (disorder) |
| 94660006 | Metastatic malignant neoplasm to ureteric orifice of urinary bladder (disorder) |
| 95025009 | Neoplasm of uncertain behavior of renal pelvis (disorder) |
| 95161002 | Neoplasm of uncertain behavior of ureter (disorder) |
| 95162009 | Neoplasm of uncertain behavior of ureteric orifice of urinary bladder (disorder) |
| 188245008 | Malignant tumor of ureteric orifice (disorder) |
| 188253000 | Malignant tumor of pelviureteric junction (disorder) |
| 300988009 | Transitional cell carcinoma of ureter (disorder) |
| 363457009 | Malignant tumor of renal pelvis (disorder) |
| 363458004 | Malignant tumor of ureter (disorder) |
| 369463005 | Malignant tumor involving ureter by direct extension from bladder (disorder) |
| 408642003 | Transitional cell carcinoma of kidney (disorder) |
| 448864006 | Malignant epithelial neoplasm of ureter (disorder) |
| 724468006 | Primary urothelial carcinoma of overlapping sites of urinary organs (disorder) |
| 733135005 | Primary urothelial carcinoma of paraurethral gland (disorder) |
| 895354002 | Primary malignant neoplasm of left ureter (disorder) |
| 895355001 | Primary malignant neoplasm of right ureter (disorder) |
| 895356000 | Primary malignant neoplasm of bilateral ureters (disorder) |
| 1208459005 | Micropapillary urothelial carcinoma (disorder) |
| 1217020002 | Sarcomatoid urothelial carcinoma of ureter (disorder) |
| 1222581000 | Lipid-rich urothelial carcinoma of urinary system (disorder) |
| 1231381006 | Clear cell urothelial carcinoma of urinary system (disorder) |
| 1259423003 | Primary transitional cell carcinoma of ureter (disorder) |
| 1259450008 | Primary transitional cell carcinoma of left ureter (disorder) |
| 1259464008 | Primary transitional cell carcinoma of left renal pelvis (disorder) |
| 1259466005 | Primary transitional cell carcinoma of right renal pelvis (disorder) |
| 1259468006 | Primary transitional cell carcinoma of right ureter (disorder) |
| 1259589004 | Primary transitional cell carcinoma of kidney (disorder) |
| 1259662001 | Primary transitional cell carcinoma of right kidney (disorder) |
| 1259664000 | Primary transitional cell carcinoma of left kidney (disorder) |
| 1259707002 | Primary sarcomatoid urothelial carcinoma of ureter (disorder) |
| 1259709004 | Primary micropapillary urothelial carcinoma (disorder) |
| 1259713006 | Primary lipid-rich urothelial carcinoma of urinary system (disorder) |
| 1259714000 | Primary clear cell urothelial carcinoma of urinary system (disorder) |
| 1263657009 | Metastatic transitional cell carcinoma to ureter (disorder) |
| 1263658004 | Metastatic transitional cell carcinoma to left ureter (disorder) |
| 352961000119103 | Primary malignant neoplasm of right renal pelvis (disorder) |
| 353111000119108 | Primary malignant neoplasm of left renal pelvis (disorder) |
| 458321000124102 | Metastatic urothelial carcinoma (disorder) |
| 682041000119100 | Primary adenocarcinoma of ureteral orifice (disorder) |
| 689441000119102 | Primary squamous cell carcinoma of ureteral orifice (disorder) |
| 689851000119102 | Primary transitional cell carcinoma of ureteral orifice (disorder) |
| 1082281000119105 | Transitional cell carcinoma of left renal pelvis (disorder) |
| 1082291000119108 | Transitional cell carcinoma of left ureter (disorder) |
| 1082301000119109 | Transitional cell carcinoma of right renal pelvis (disorder) |
| 1082311000119107 | Transitional cell carcinoma of right ureter (disorder) |
| 15959061000119101 | Transitional cell carcinoma of left kidney (disorder) |
| 15959101000119103 | Transitional cell carcinoma of right kidney (disorder) |

**Prior Ureteroscopy**

| CODE | DESCRIPTION |
| --- | --- |
| 52352 | Cystourethroscopy, with ureteroscopy and/or pyeloscopy; with removal or manipulation of calculus (ureteral catheterization is included) |
| 52353 | Cystourethroscopy, with ureteroscopy and/or pyeloscopy; with lithotripsy (ureteral catheterization is included) |
| 52356 | Cystourethroscopy, with ureteroscopy and/or pyeloscopy; with lithotripsy including insertion of indwelling ureteral stent (eg, Gibbons or double-J type) |
| 0TC38ZZ | Extirpation of Matter from Right Kidney Pelvis, Via Natural or Artificial Opening Endoscopic |
| 0TC48ZZ | Extirpation of Matter from Left Kidney Pelvis, Via Natural or Artificial Opening Endoscopic |
| 0TC68ZZ | Extirpation of Matter from Right Ureter, Via Natural or Artificial Opening Endoscopic |
| 0TC78ZZ | Extirpation of Matter from Left Ureter, Via Natural or Artificial Opening Endoscopic |

**Stent Placement Prior to Index**

| CODE | DESCRIPTION |
| --- | --- |
| 52332 | Cystourethroscopy, with insertion of indwelling ureteral stent (eg, Gibbons or double-J type) |
| 0T768DZ | Dilation of Right Ureter with Intraluminal Device, Via Natural or Artificial Opening Endoscopic |
| 0T778DZ | Dilation of Left Ureter with Intraluminal Device, Via Natural or Artificial Opening Endoscopic |
| 0T788DZ | Dilation of Bilateral Ureters with Intraluminal Device, Via Natural or Artificial Opening Endoscopic |

**Stone/Calculi**

| CODE | DESCRIPTION |
| --- | --- |
| 592.0 | Calculus of kidney |
| 592.1 | Calculus of ureter |
| 592.9 | Unspecified urinary calculus |
| N13.2 | Hydronephrosis with renal and ureteral calculous obstruction |
| N20.0 | Calculus of kidney |
| N20.1 | Calculus of ureter |
| N20.2 | Calculus of kidney with calculus of ureter |
| N20.9 | Urinary calculus, unspecified |

**Stent removal post-index**

| CODE | DESCRIPTION |
| --- | --- |
| 52310 | Cystourethroscopy, with removal of foreign body, calculus, or ureteral stent from urethra or bladder (separate procedure); simple |
| 52315 | Cystourethroscopy, with removal of foreign body, calculus, or ureteral stent from urethra or bladder (separate procedure); complicated |
| 0TPB8DZ | Removal of Intraluminal Device from Bladder, Via Natural or Artificial Opening Endoscopic |
| 0TPD8DZ | Removal of Intraluminal Device from Urethra, Via Natural or Artificial Opening Endoscopic |

**Post-index stricture**

| CODE | DESCRIPTION |
| --- | --- |
| N13.0 | Hydronephrosis with ureteropelvic junction obstruction |
| N13.1 | Hydronephrosis with ureteral stricture, not elsewhere classified |
| N13.30 | Unspecified hydronephrosis |
| N13.39 | Other hydronephrosis |
| N13.4 | Hydroureter |
| N13.5 | Crossing vessel and stricture of ureter without hydronephrosis |
| N13.6 | Pyonephrosis |
| N13.8 | Other obstructive and reflux uropathy |
| N13.9 | Obstructive and reflux uropathy, unspecified |

**Stricture management: Ureteral stent**

| CODE | DESCRIPTION |
| --- | --- |
| 50432 | Placement of nephrostomy catheter, percutaneous, including diagnostic nephrostogram and/or ureterogram when performed, imaging guidance (eg, ultrasound and/or fluoroscopy) and all associated radiological supervision and interpretation |
| 50433 | Placement of nephroureteral catheter, percutaneous, including diagnostic nephrostogram and/or ureterogram when performed, imaging guidance (eg, ultrasound and/or fluoroscopy) and all associated radiological supervision and interpretation, new access |
| 50434 | Convert nephrostomy catheter to nephroureteral catheter, percutaneous, including diagnostic nephrostogram and/or ureterogram when performed, imaging guidance (eg, ultrasound and/or fluoroscopy) and all associated radiological supervision and interpretation, via pre-existing nephrostomy tract |
| 50435 | Exchange nephrostomy catheter, percutaneous, including diagnostic nephrostogram and/or ureterogram when performed, imaging guidance (eg, ultrasound and/or fluoroscopy) and all associated radiological supervision and interpretation |
| 50432 | Placement of nephrostomy catheter, percutaneous, including diagnostic nephrostogram and/or ureterogram when performed, imaging guidance (eg, ultrasound and/or fluoroscopy) and all associated radiological supervision and interpretation |
| 50693 | Placement of ureteral stent, percutaneous, including diagnostic nephrostogram and/or ureterogram when performed, imaging guidance (eg, ultrasound and/or fluoroscopy), and all associated radiological supervision and interpretation; pre-existing nephrostomy tract |
| 50694 | Placement of ureteral stent, percutaneous, including diagnostic nephrostogram and/or ureterogram when performed, imaging guidance (eg, ultrasound and/or fluoroscopy), and all associated radiological supervision and interpretation; new access, without separate nephrostomy catheter |
| 50695 | Placement of ureteral stent, percutaneous, including diagnostic nephrostogram and/or ureterogram when performed, imaging guidance (eg, ultrasound and/or fluoroscopy), and all associated radiological supervision and interpretation; new access, with separate nephrostomy catheter |
| 52332 | Cystourethroscopy, with insertion of indwelling ureteral stent (eg, Gibbons or double-J type) |
| 0T9030Z | Drainage of Right Kidney with Drainage Device, Percutaneous Approach |
| 0T25X0Z | Change Drainage Device in Kidney, External Approach |
| 0T763DZ | Dilation of Right Ureter with Intraluminal Device, Percutaneous Approach |
| 0T768DZ | Dilation of Right Ureter with Intraluminal Device, Via Natural or Artificial Opening Endoscopic |
| 0T773DZ | Dilation of Left Ureter with Intraluminal Device, Percutaneous Approach |
| 0T778DZ | Dilation of Left Ureter with Intraluminal Device, Via Natural or Artificial Opening Endoscopic |
| 0T783DZ | Dilation of Bilateral Ureters with Intraluminal Device, Percutaneous Approach |
| 0T788DZ | Dilation of Bilateral Ureters with Intraluminal Device, Via Natural or Artificial Opening Endoscopic |
| 0T9130Z | Drainage of Left Kidney with Drainage Device, Percutaneous Approach |
| 0T9330Z | Drainage of Right Kidney Pelvis with Drainage Device, Percutaneous Approach |
| 0T9430Z | Drainage of Left Kidney Pelvis with Drainage Device, Percutaneous Approach |
| 0T9630Z | Drainage of Right Ureter with Drainage Device, Percutaneous Approach |
| 0T9730Z | Drainage of Left Ureter with Drainage Device, Percutaneous Approach |
| C1729 | Catheter, drainage |
| C2617 | Stent, non-coronary, temporary, without delivery system |
| C2625 | Stent, non-coronary, temporary, with delivery system |

**Stricture management: Endoscopic dilation/incision**

| CODE | DESCRIPTION |
| --- | --- |
| 50575 | Renal endoscopy through nephrotomy or pyelotomy, with or without irrigation, instillation, or ureteropyelography, exclusive of radiologic service; with endopyelotomy (includes cystoscopy, ureteroscopy, dilation of ureter and ureteral pelvic junction, incision of ureteral pelvic junction and insertion of endopyelotomy stent) |
| 52341 | Cystourethroscopy; with treatment of ureteral stricture (eg, balloon dilation, laser, electrocautery, and incision) |
| 52342 | Cystourethroscopy; with treatment of ureteropelvic junction stricture (eg, balloon dilation, laser, electrocautery, and incision) |
| 52343 | Cystourethroscopy; with treatment of intra-renal stricture (eg, balloon dilation, laser, electrocautery, and incision) |
| 52344 | Cystourethroscopy with ureteroscopy; with treatment of ureteral stricture (eg, balloon dilation, laser, electrocautery, and incision) |
| 52345 | Cystourethroscopy with ureteroscopy; with treatment of ureteropelvic junction stricture (eg, balloon dilation, laser, electrocautery, and incision) |
| 52346 | Cystourethroscopy with ureteroscopy; with treatment of intra-renal stricture (eg, balloon dilation, laser, electrocautery, and incision) |
| 50706 | Balloon dilation, ureteral stricture, including imaging guidance (eg, ultrasound and/or fluoroscopy) and all associated radiological supervision and interpretation (List separately in addition to code for primary procedure) |
| 0T764DZ | Dilation of Right Ureter with Intraluminal Device, Percutaneous Endoscopic Approach |
| 0T774DZ | Dilation of Left Ureter with Intraluminal Device, Percutaneous Endoscopic Approach |
| 3E0K8KZ | Introduction of Other Diagnostic Substance into Genitourinary Tract, Via Natural or Artificial Opening Endoscopic |
| 0T568ZZ | Destruction of Right Ureter, Via Natural or Artificial Opening Endoscopic |
| 0T578ZZ | Destruction of Left Ureter, Via Natural or Artificial Opening Endoscopic |
| 0T768ZZ | Dilation of Right Ureter, Via Natural or Artificial Opening Endoscopic |
| 0T778ZZ | Dilation of Left Ureter, Via Natural or Artificial Opening Endoscopic |
| 0T788DZ | Dilation of Bilateral Ureters with Intraluminal Device, Via Natural or Artificial Opening Endoscopic |
| 0T538ZZ | Destruction of Right Kidney Pelvis, Via Natural or Artificial Opening Endoscopic |
| 0T548ZZ | Destruction of Left Kidney Pelvis, Via Natural or Artificial Opening Endoscopic |
| 0T738ZZ | Dilation of Right Kidney Pelvis, Via Natural or Artificial Opening Endoscopic |
| 0T748ZZ | Dilation of Left Kidney Pelvis, Via Natural or Artificial Opening Endoscopic |

**Stricture management: Reconstruction**

| CODE | DESCRIPTION |
| --- | --- |
| 50400 | Pyeloplasty (Foley Y-pyeloplasty), plastic operation on renal pelvis, with or without plastic operation on ureter, nephropexy, nephrostomy, pyelostomy, or ureteral splinting; simple |
| 50405 | Pyeloplasty (Foley Y-pyeloplasty), plastic operation on renal pelvis, with or without plastic operation on ureter, nephropexy, nephrostomy, pyelostomy, or ureteral splinting; complicated (congenital kidney abnormality, secondary pyeloplasty, solitary kidney, calycoplasty) |
| 50544 | Laparoscopy, surgical; pyeloplasty |
| 50700 | Ureteroplasty, plastic operation on ureter (eg, stricture) |
| 50740 | Ureteropyelostomy, anastomosis of ureter and renal pelvis |
| 50760 | Ureteroureterostomy |
| 50770 | Transureteroureterostomy, anastomosis of ureter to contralateral ureter |
| 50780 | Ureteroneocystostomy; anastomosis of single ureter to bladder |
| 50840 | Replacement of all or part of ureter by intestine segment, including intestine anastomosis |
| 50947 | Laparoscopy, surgical; ureteroneocystostomy with cystoscopy and ureteral stent placement |
| 50948 | Laparoscopy, surgical; ureteroneocystostomy without cystoscopy and ureteral stent placement |
| 50949 | Unlisted laparoscopy procedure, ureter |
| 50900 | Ureterorrhaphy |
| 50740 | Ureteropyelostomy, anastomosis of ureter and renal pelvis |
| 50750 | Ureterocalycostomy |
| 50760 | Ureteroureterostomy |
| 50770 | Transureteroureterostomy, anastomosis of ureter to contralateral ureter |
| 50800 | Ureteroenterostomy |
| 0TQ00ZZ | Repair Right Kidney, Open Approach |
| 0TQ10ZZ | Repair Left Kidney, Open Approach |
| 0TQ30ZZ | Repair Right Kidney Pelvis, Open Approach |
| 0TQ40ZZ | Repair Left Kidney Pelvis, Open Approach |
| 0TQ34ZZ | Repair Right Kidney Pelvis, Percutaneous Endoscopic Approach |
| 0TQ44ZZ | Repair Left Kidney Pelvis, Percutaneous Endoscopic Approach |
| 0T760ZZ | Dilation of Right Ureter, Open Approach |
| 0T770ZZ | Dilation of Left Ureter, Open Approach |
| 0T780ZZ | Dilation of Bilateral Ureters, Open Approach |
| 0TQ60ZZ | Repair Right Ureter, Open Approach |
| 0TQ70ZZ | Repair Left Ureter, Open Approach |
| 0TU60JZ | Supplement Right Ureter with Synthetic Substitute, Open Approach |
| 0TU70JZ | Supplement Left Ureter with Synthetic Substitute, Open Approach |
| 0T130Z6 | Bypass Right Kidney Pelvis to Right Ureter, Open Approach |
| 0T130Z7 | Bypass Right Kidney Pelvis to Left Ureter, Open Approach |
| 0T140Z6 | Bypass Left Kidney Pelvis to Right Ureter, Open Approach |
| 0T140Z7 | Bypass Left Kidney Pelvis to Left Ureter, Open Approach |
| 0T160Z6 | Bypass Right Ureter to Right Ureter, Open Approach |
| 0T170Z7 | Bypass Left Ureter to Left Ureter, Open Approach |
| 0T180Z6 | Bypass Bilateral Ureters to Right Ureter, Open Approach |
| 0T180Z7 | Bypass Bilateral Ureters to Left Ureter, Open Approach |
| 0T160Z7 | Bypass Right Ureter to Left Ureter, Open Approach |
| 0T170Z6 | Bypass Left Ureter to Right Ureter, Open Approach |
| 0T160ZB | Bypass Right Ureter to Bladder, Open Approach |
| 0T170ZB | Bypass Left Ureter to Bladder, Open Approach |
| 0T180ZB | Bypass Bilateral Ureters to Bladder, Open Approach |
| 0TR607Z | Replacement of Right Ureter with Autologous Tissue Substitute, Open Approach |
| 0TR707Z | Replacement of Left Ureter with Autologous Tissue Substitute, Open Approach |
| 0T164ZB | Bypass Right Ureter to Bladder, Percutaneous Endoscopic Approach |
| 0T174ZB | Bypass Left Ureter to Bladder, Percutaneous Endoscopic Approach |
| 0T764DZ | Dilation of Right Ureter with Intraluminal Device, Percutaneous Endoscopic Approach |
| 0T774DZ | Dilation of Left Ureter with Intraluminal Device, Percutaneous Endoscopic Approach |
| 0T784DZ | Dilation of Bilateral Ureters with Intraluminal Device, Percutaneous Endoscopic Approach |
| 0T13076 | Bypass Right Kidney Pelvis to Right Ureter with Autologous Tissue Substitute, Open Approach |
| 0T13077 | Bypass Right Kidney Pelvis to Left Ureter with Autologous Tissue Substitute, Open Approach |
| 0T14076 | Bypass Left Kidney Pelvis to Right Ureter with Autologous Tissue Substitute, Open Approach |
| 0T14077 | Bypass Left Kidney Pelvis to Left Ureter with Autologous Tissue Substitute, Open Approach |
| 0T160ZA | Bypass Right Ureter to Ileum, Open Approach |
| 0T170ZA | Bypass Left Ureter to Ileum, Open Approach |
| 0T180ZA | Bypass Bilateral Ureters to Ileum, Open Approach |

**Stricture management: Nephrectomy**

| CODE | DESCRIPTION |
| --- | --- |
| 50220 | Nephrectomy, including partial ureterectomy, any open approach including rib resection; |
| 50225 | Nephrectomy, including partial ureterectomy, any open approach including rib resection; complicated because of previous surgery on same kidney |
| 50234 | Nephrectomy with total ureterectomy and bladder cuff; through same incision |
| 50236 | Nephrectomy with total ureterectomy and bladder cuff; through separate incision |
| 50545 | Laparoscopy, surgical; radical nephrectomy (includes removal of Gerota's fascia and surrounding fatty tissue, removal of regional lymph nodes, and adrenalectomy) |
| 50546 | Laparoscopy, surgical; nephrectomy, including partial ureterectomy |
| 50548 | Laparoscopy, surgical; nephrectomy with total ureterectomy |
| 0TB60ZZ | Excision of Right Ureter, Open Approach |
| 0TB70ZZ | Excision of Left Ureter, Open Approach |
| 0TT00ZZ | Resection of Right Kidney, Open Approach |
| 0TT10ZZ | Resection of Left Kidney, Open Approach |
| 0TBB0ZZ | Excision of Bladder, Open Approach |
| 0TT04ZG | Resection of Right Kidney, Percutaneous Endoscopic Approach, Hand-Assisted |
| 0TT04ZZ | Resection of Right Kidney, Percutaneous Endoscopic Approach |
| 0TT14ZG | Resection of Left Kidney, Percutaneous Endoscopic Approach, Hand-Assisted |
| 0TT14ZZ | Resection of Left Kidney, Percutaneous Endoscopic Approach |
| 0TT64ZZ | Resection of Right Ureter, Percutaneous Endoscopic Approach |
| 0TT74ZZ | Resection of Left Ureter, Percutaneous Endoscopic Approach |
| 0TB64ZZ | Excision of Right Ureter, Percutaneous Endoscopic Approach |
| 0TB74ZZ | Excision of Left Ureter, Percutaneous Endoscopic Approach |
